# Supplementary material for: DNA/BSA binding, antidiabetic and antioxidant studies of copper(ii) complexes derived from ONO-tridentate Schiff bases and diimines as auxiliary ligands
Source: Royal Society of Chemistry journal article supplement (doi:10.1039/d6ra01650b), 2026-04-10
Supplement: d6ra01650b1.pdf [file d6ra01650b1.pdf]

## DNA/BSA binding, antidiabetic and antioxidant studies of copper(II) complexes derived from *ONO*-tridentate Schiff bases and diimines as auxiliary ligand

Segun D. Oladipo<sup>a\*</sup>, Adesola A. Adeleke<sup>b</sup>, Kolawole A. Olofisan<sup>c</sup>, Bernard Omondi<sup>b</sup>, and Robert C. Luckay<sup>a\*</sup>

<sup>a</sup>Department of Chemistry and Polymer Science, Stellenbosch University, Private Bag X1, Matieland 7602, South Africa

<sup>b</sup>School of Agriculture and Science, Discipline of Chemistry, University of Kwazulu-Natal, Durban, South Africa

<sup>c</sup>Department of pharmacology, University of Free State, Bloemfontein 9300, South Africa

\*Corresponding authors: S. D. Oladipo ([segun.oladipo@oouagoiwoye.edu.ng](mailto:segun.oladipo@oouagoiwoye.edu.ng)) and R.C. Luckay ([rluckay@sun.ac.za](mailto:rluckay@sun.ac.za))

### Supplementary information

#### Table of contents

| <u>Figures</u>                                                                                | <u>Page</u> |
|-----------------------------------------------------------------------------------------------|-------------|
| Figure S1: FT-IR spectrum for <b>1</b>                                                        | 3           |
| Figure S2: FT-IR spectrum for <b>2</b>                                                        | 4           |
| Figure S3: FT-IR spectrum for <b>3</b>                                                        | 5           |
| Figure S4: FT-IR spectrum for <b>4</b>                                                        | 6           |
| Figure S5: FT-IR spectrum for <b>5</b>                                                        | 7           |
| Figure S6: FT-IR spectrum for <b>6</b>                                                        | 8           |
| Figure S7: Electronic absorption spectra showing the d-d transitions of complexes <b>1- 6</b> | 9           |
| Figure S8: EPR spectra of complexes <b>5 - 6</b>                                              | 10          |
| Figure S9: Mass spectrum for <b>1</b>                                                         | 11          |
| Figure S10: Mass spectrum for <b>2</b>                                                        | 12          |
| Figure S11: Mass spectrum for <b>3</b>                                                        | 13          |
| Figure S12: Mass spectrum for <b>4</b>                                                        | 14          |
| Figure S13: Mass spectrum for <b>5</b>                                                        | 15          |
| Figure S14: Mass spectrum for <b>6</b>                                                        | 16          |

|                                                                                                                                                    |    |
|----------------------------------------------------------------------------------------------------------------------------------------------------|----|
| Figure S15: Electronic absorption spectrum of complex <b>1</b> in the absence (dashed line) and the presence of different concentrations of ctDNA  | 17 |
| Figure S16: Electronic absorption spectrum of complex <b>2</b> in the absence (dashed line) and the presence of different concentrations of ctDNA  | 18 |
| Figure S17: Electronic absorption spectrum of complex <b>3</b> in the absence (dashed line) and the presence of different concentrations of ctDNA  | 19 |
| Figure S18: Electronic absorption spectrum of complex <b>4</b> in the absence (dashed line) and the presence of different concentrations of ctDNA  | 20 |
| Figure S19: Electronic absorption spectrum of complex <b>6</b> in the absence (dashed line) and the presence of different concentrations of ctDNA  | 21 |
| Figure S20: Electronic absorption spectrum of complex <b>L1</b> in the absence (dashed line) and the presence of different concentrations of ctDNA | 22 |
| Figure S21: Electronic absorption spectrum of complex <b>L2</b> in the absence (dashed line) and the presence of different concentrations of ctDNA | 23 |
| Figure S22: Electronic absorption spectrum of complex <b>L3</b> in the absence (dashed line) and the presence of different concentrations of ctDNA | 24 |
| Figure S23: Electronic Absorption Spectra of BSA in the absence (dashed line) and the presence of different concentrations of complex <b>1</b> .   | 25 |
| Figure S24: Electronic Absorption Spectra of BSA in the absence (dashed line) and the presence of different concentrations of complex <b>2</b> .   | 26 |
| Figure S25: Electronic Absorption Spectra of BSA in the absence (dashed line) and the presence of different concentrations of complex <b>3</b> .   | 27 |
| Figure S26: Electronic Absorption Spectra of BSA in the absence (dashed line) and the presence of different concentrations of complex <b>4</b> .   | 28 |
| Figure S27: Electronic Absorption Spectra of BSA in the absence (dashed line) and the presence of different concentrations of complex <b>5</b> .   | 29 |

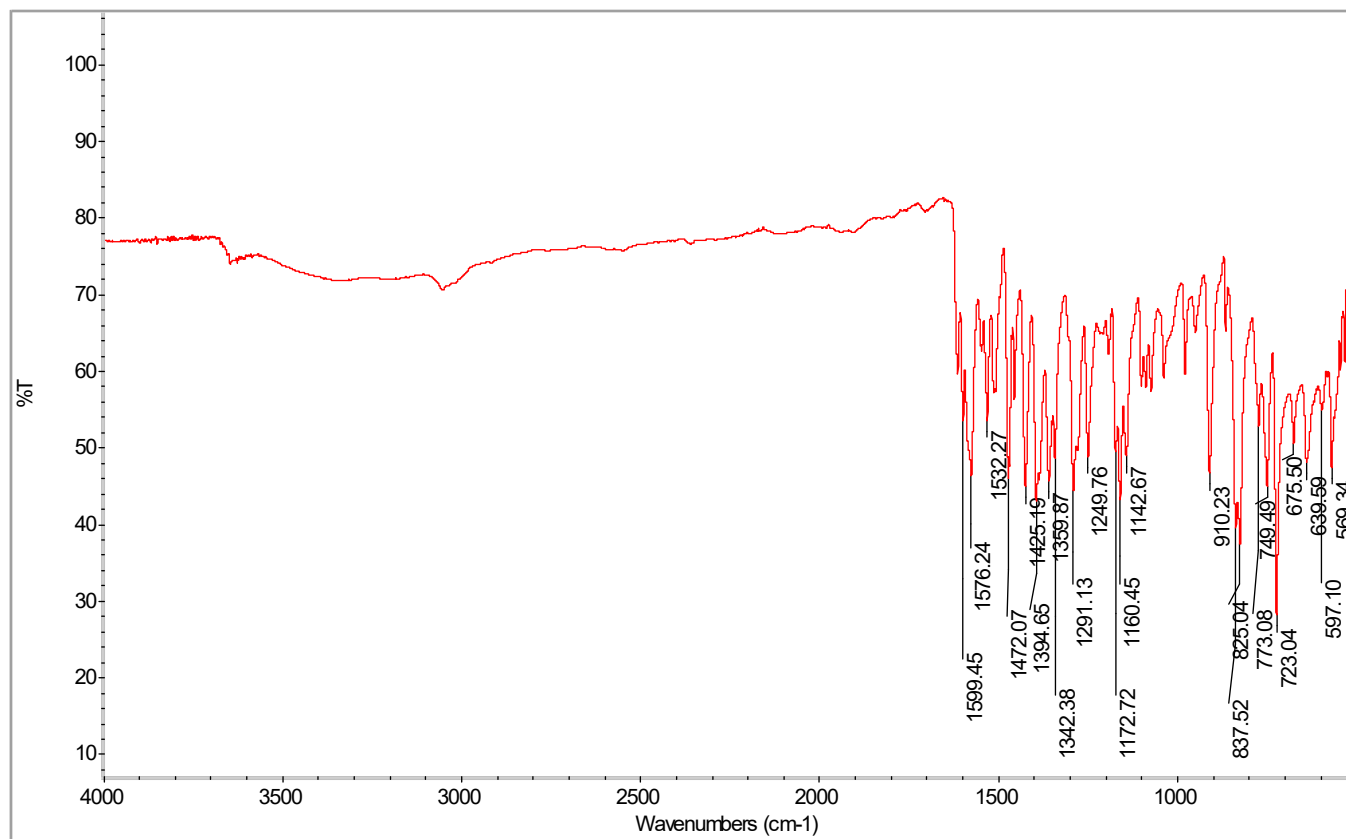

**Figure S1:** FT-IR spectrum of complex 1

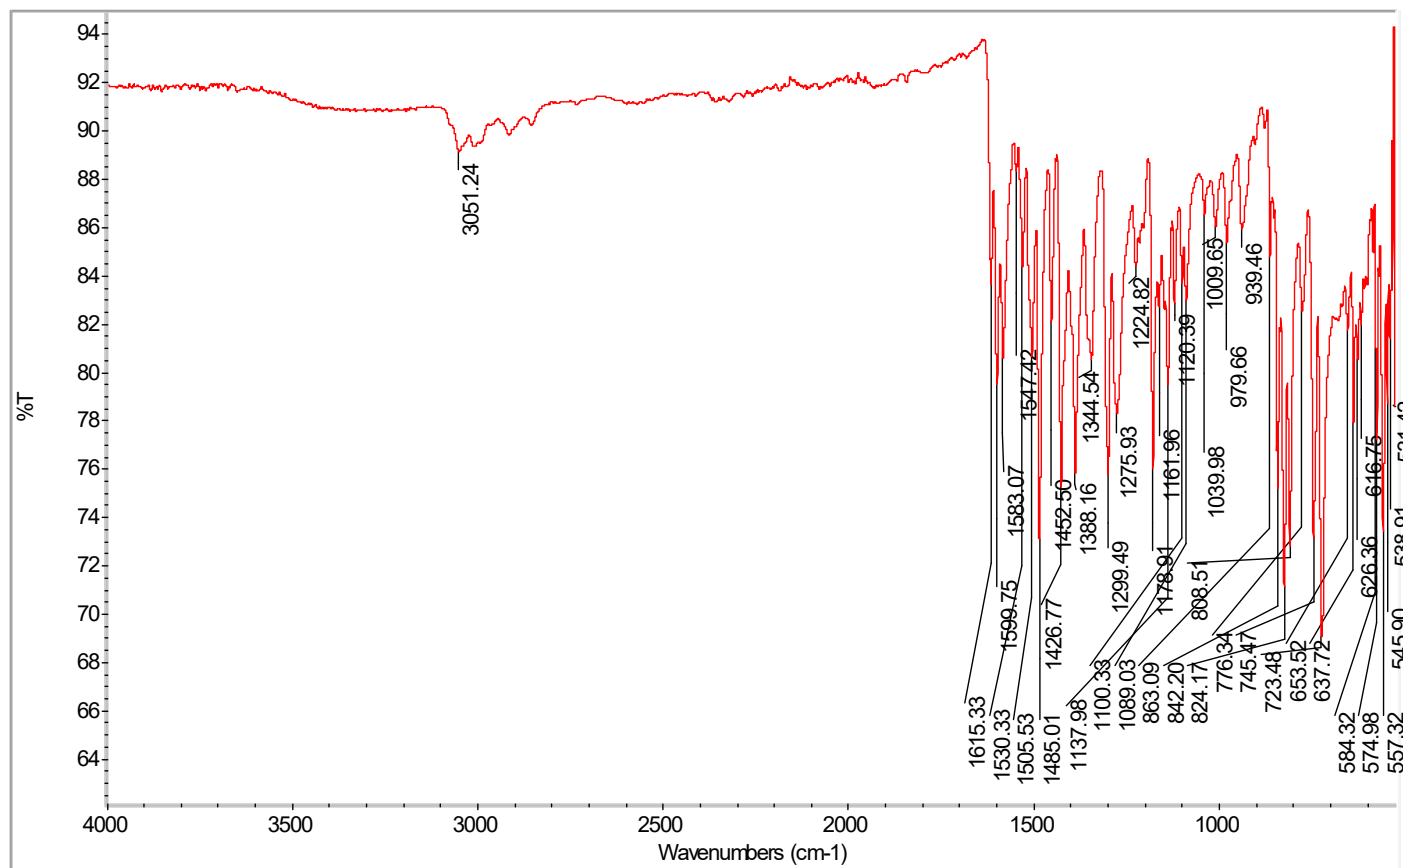

**Figure S2:** FT-IR spectrum of complex 2

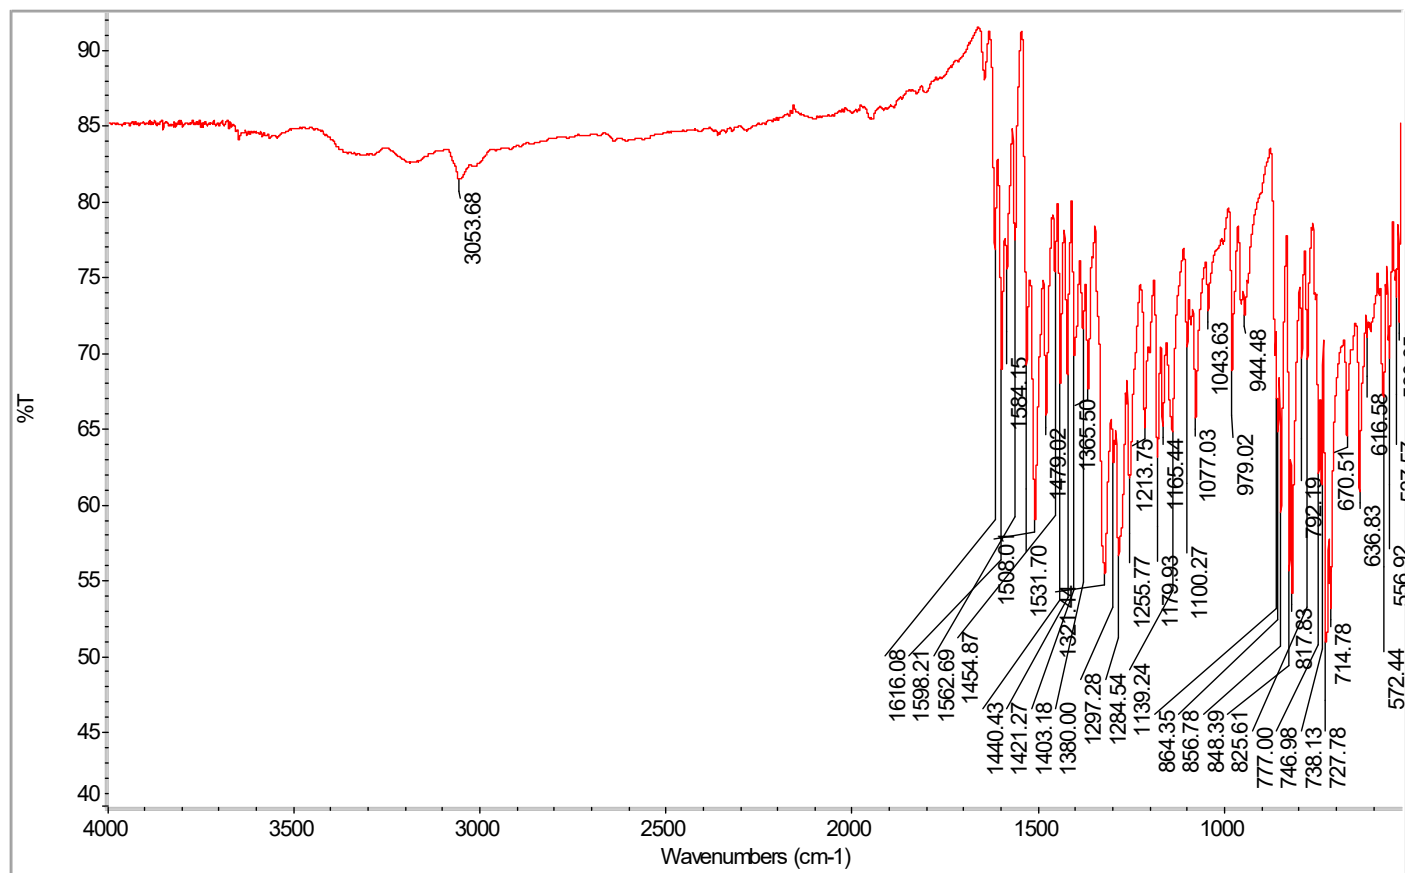

**Figure S3:** FT-IR spectrum of complex 3

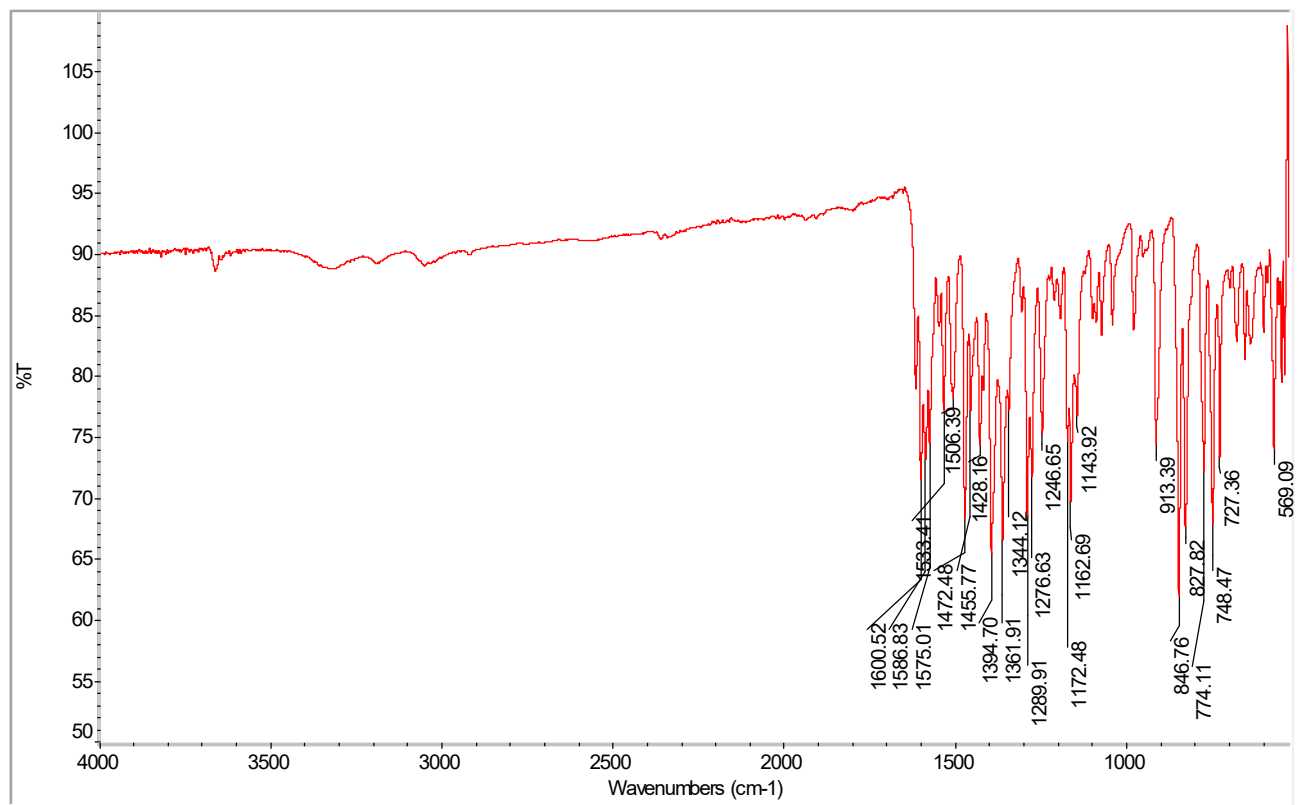

**Figure S4:** FT-IR spectrum of complex 4

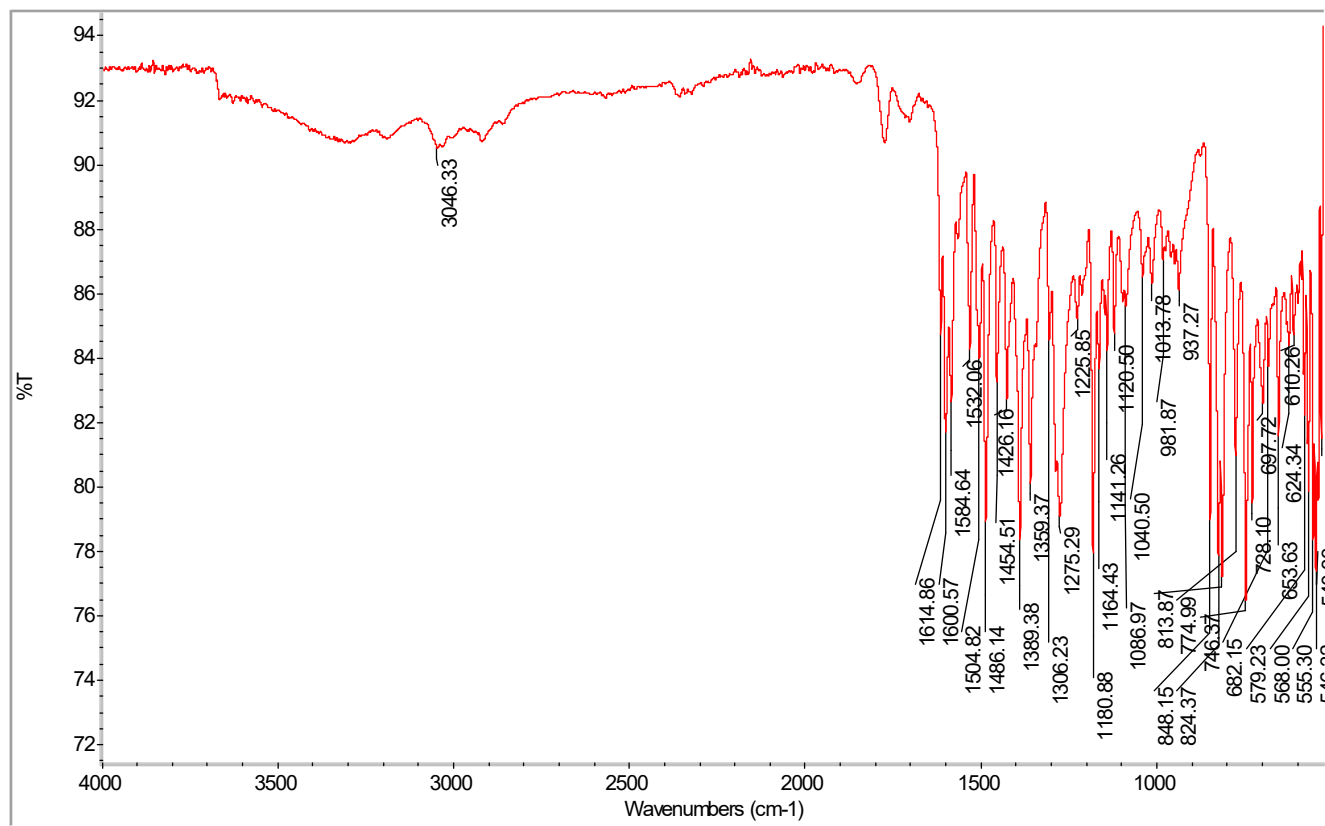

**Figure S5:** FT-IR spectrum of complex 5

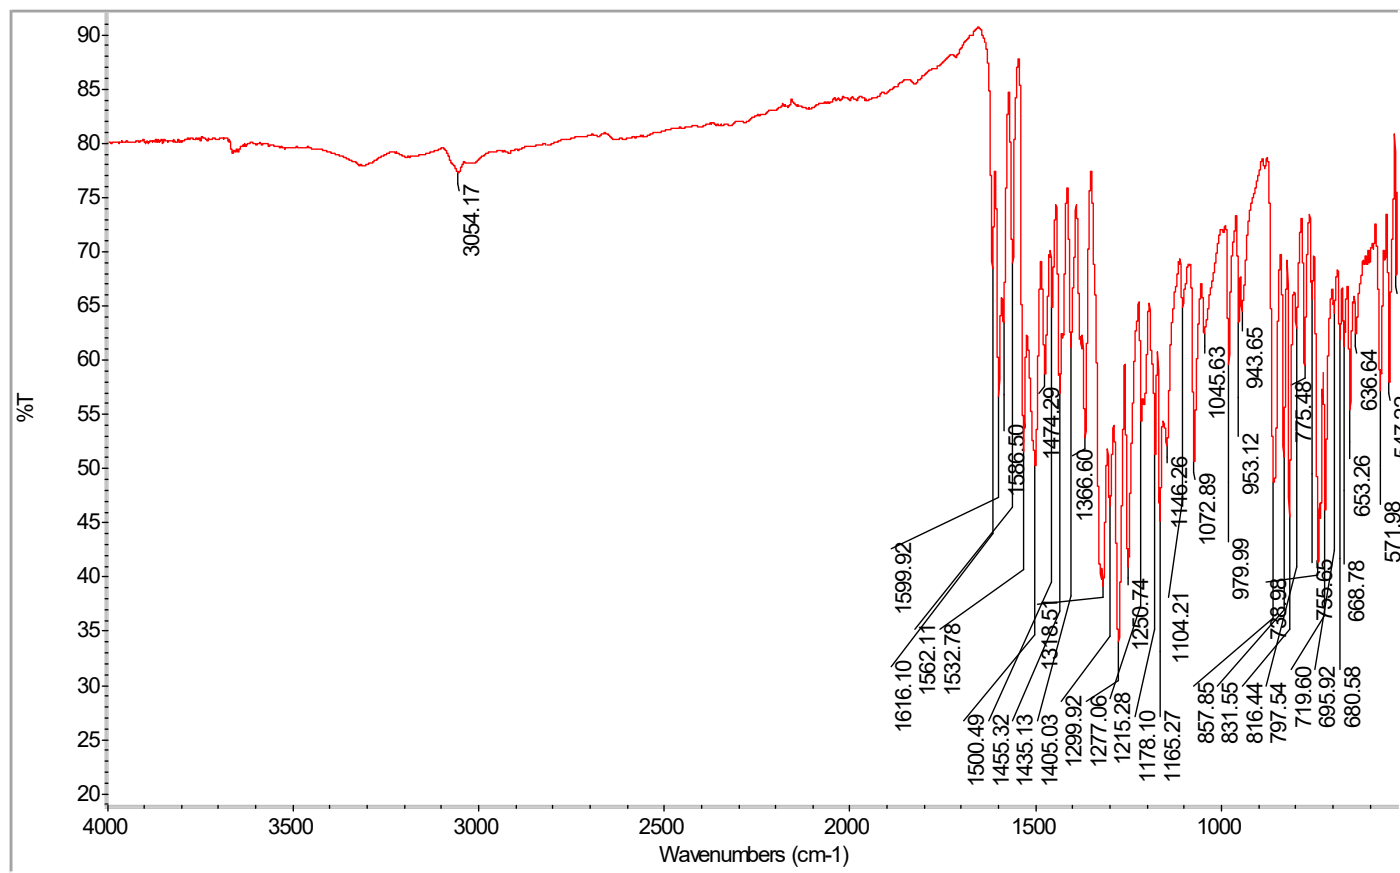

**Figure S6:** FT-IR spectrum of complex 6

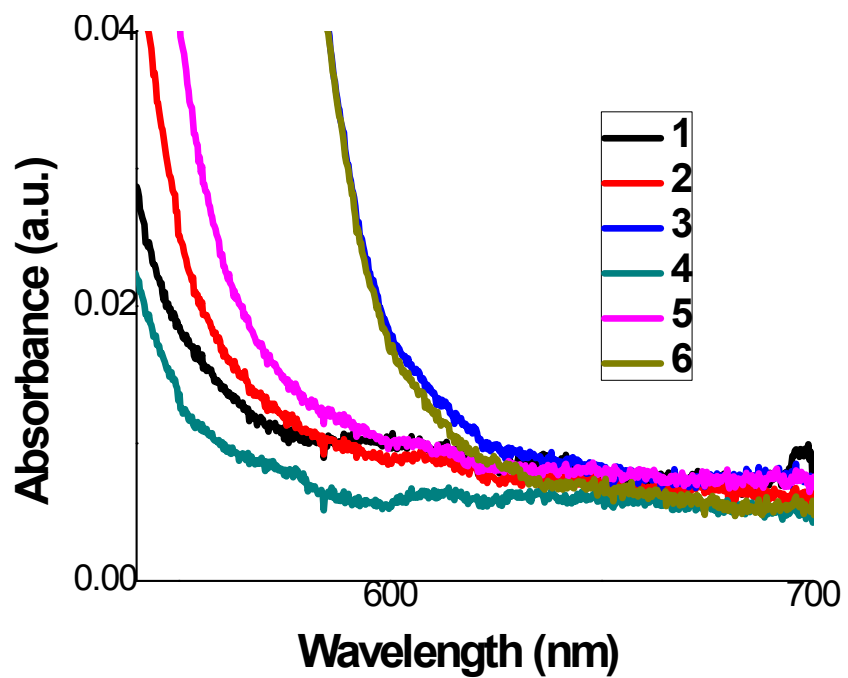

**Figure S7:** Electronic absorption spectra showing the d-d transitions of complexes **1 - 6**

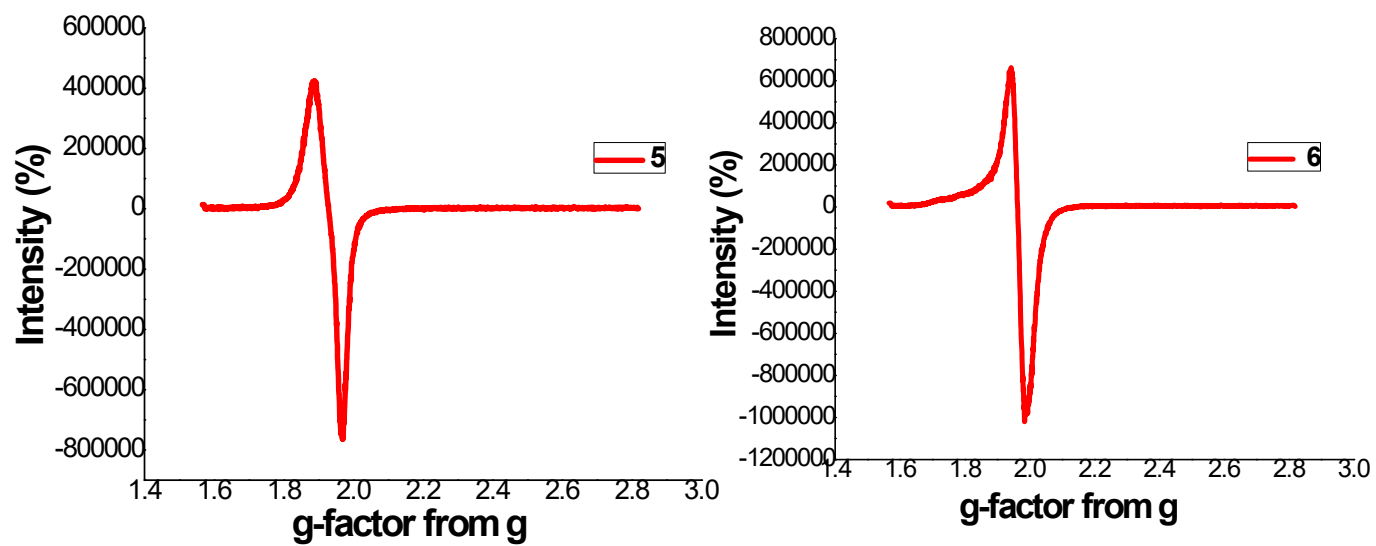

Figure S8: EPR spectra of complexes 5 - 6

**Cu-HNC-P**

HRMS\_Direct\_251107\_6 8 (0.074) AM2 (Ar,19507.5,556.28,0.00,LS 5); Cm (8:12)

1: TOF MS ES+  
5.54e4

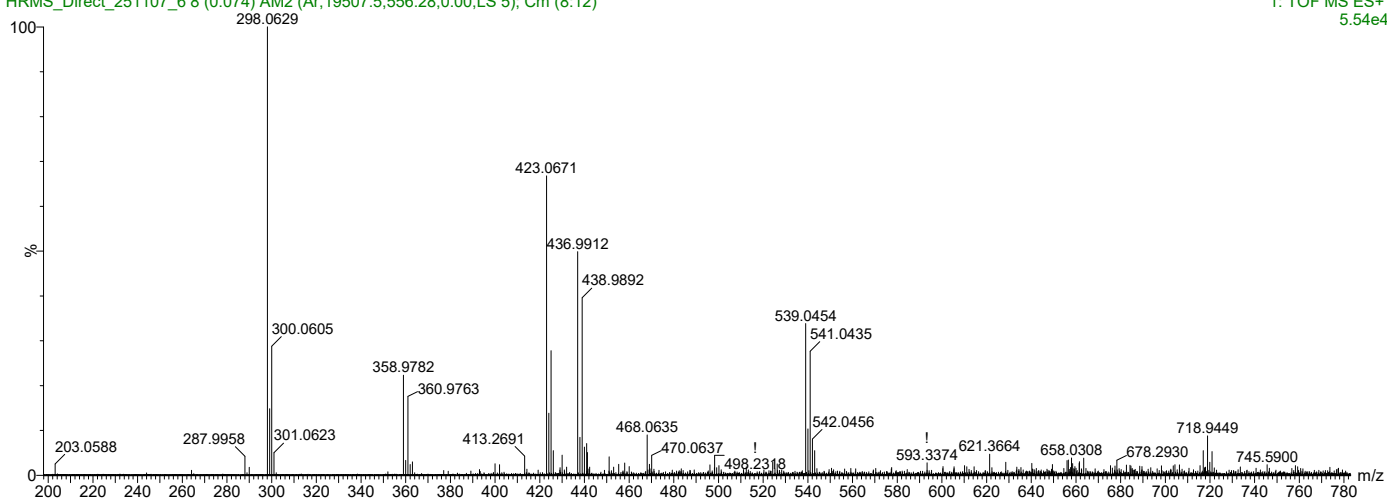

**Figure S9: Mass spectrum of complex 1**

**Cu-HNM-P**

HRMS\_Direct\_251107\_4 8 (0.074) AM2 (Ar,19507.5,556.28,0.00,LS 5); Cm (7:11)

1: TOF MS ES+  
4.87e5

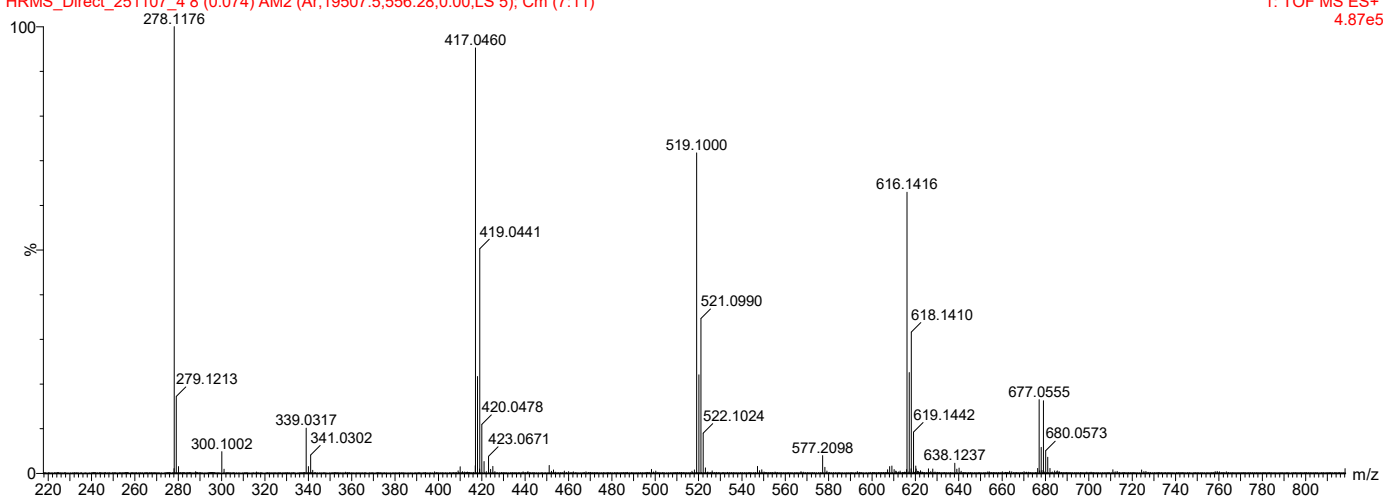

**Figure S10: Mass spectrum of complex 2**

Cu-HNN-P

HRMS\_Direct\_251107\_5\_9 (0.081) AM2 (Ar,19507.5,556.28,0.00,LS 5); Cm (8:11)

1: TOF MS ES+  
8.86e4

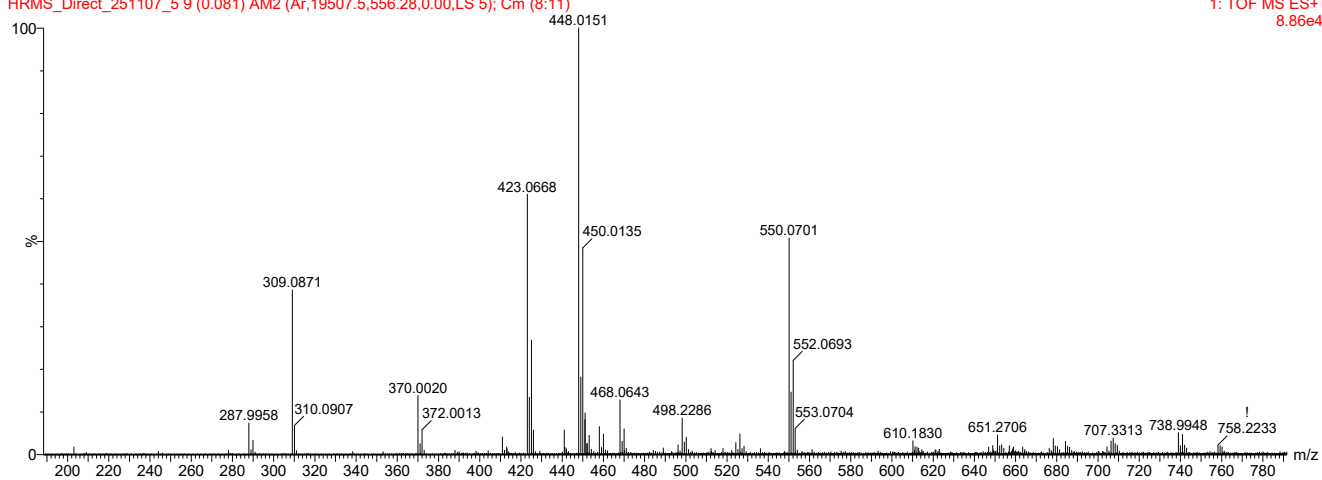

Figure S11: Mass spectrum of spectrum 3

**Cu-HNC-MP**

HRMS\_Direct\_251107\_1 9 (0.081) AM2 (Ar,19507.5,556.28,0.00,LS 5); Cm (7:11)

1: TOF MS ES+  
1.65e6

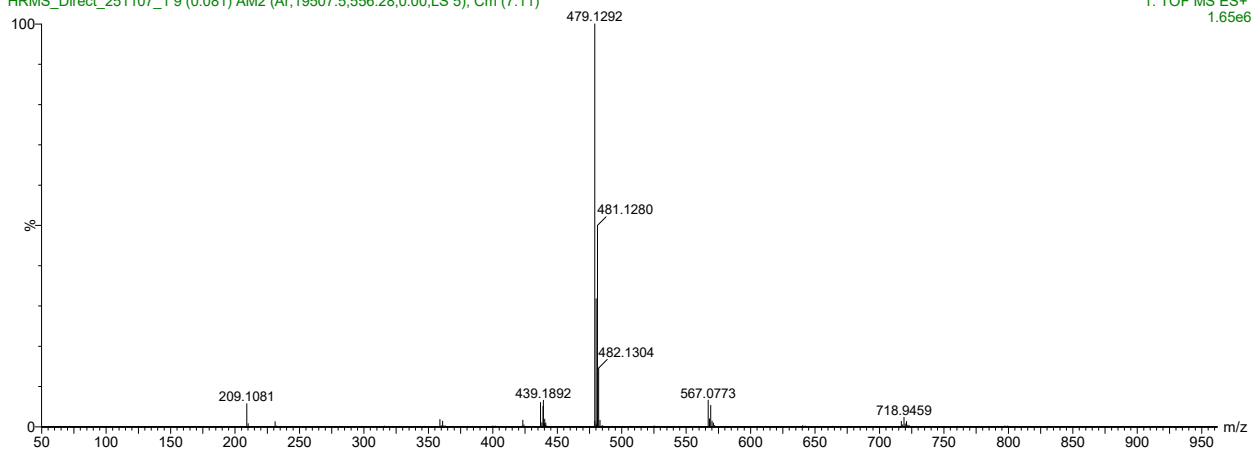

**Figure S12:** Mass spectrum of complex 4

**Cu-HMN-MP**

HRMS\_Direct\_251107\_3 7 (0.067) AM2 (Ar,19507.5,556.28,0.00,LS 5); Cm (7:12)

1: TOF MS ES+  
1.16e6

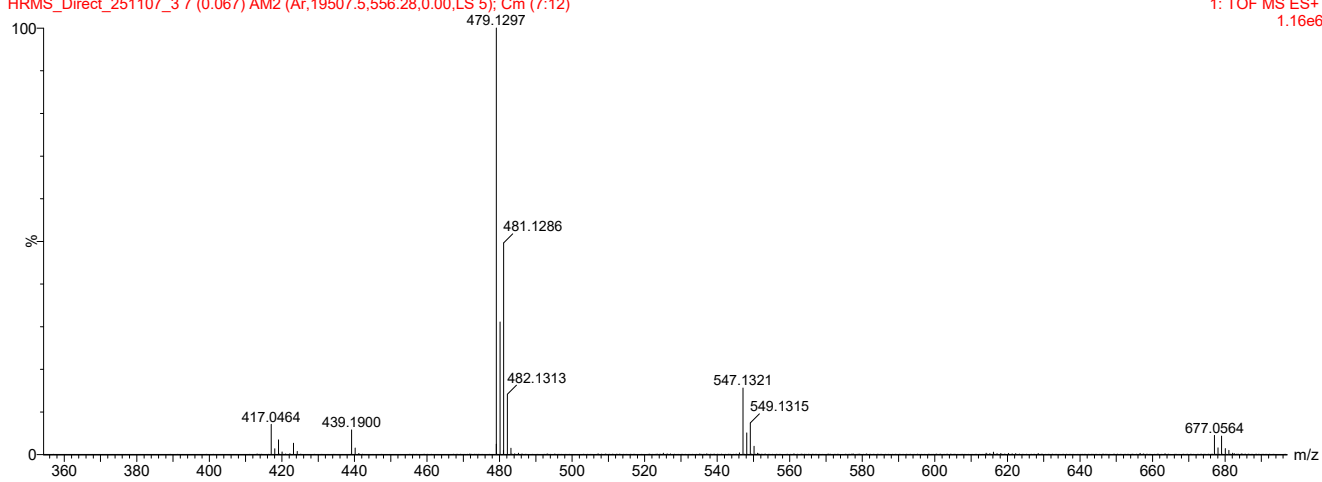

**Figure S13:** Mass spectrum of complex 5

Cu-HNN-MP

HRMS\_Direct\_251107\_2\_10 (0.088) AM2 (Ar,19507.5,556.28,0.00,LS 5); Cm (8:13)

1: TOF MS ES+  
1.09e6

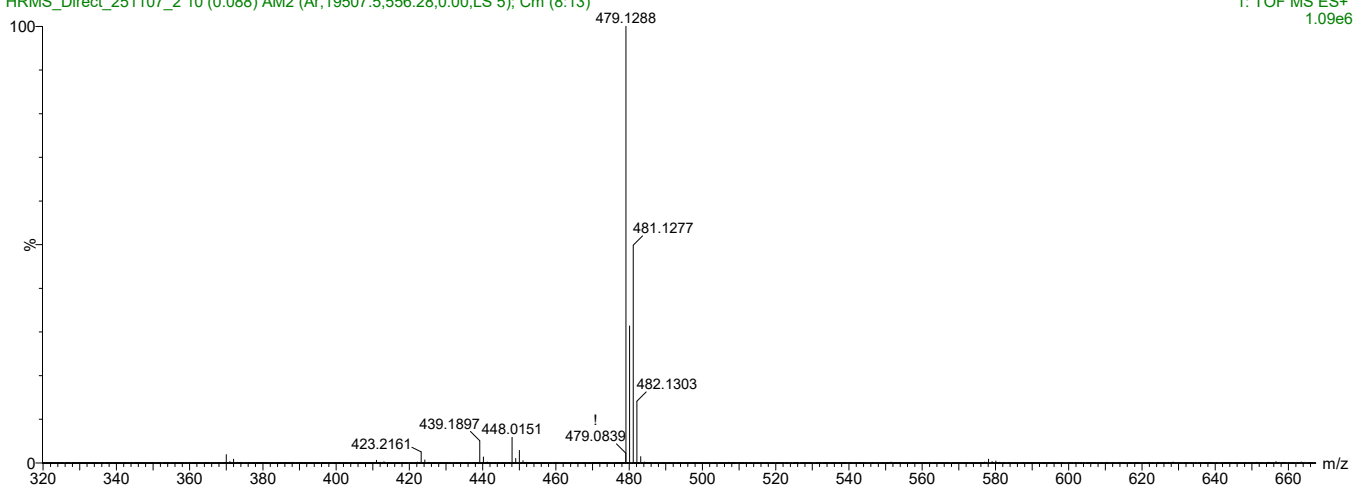

Figure S14: Mass spectrum of spectrum 6

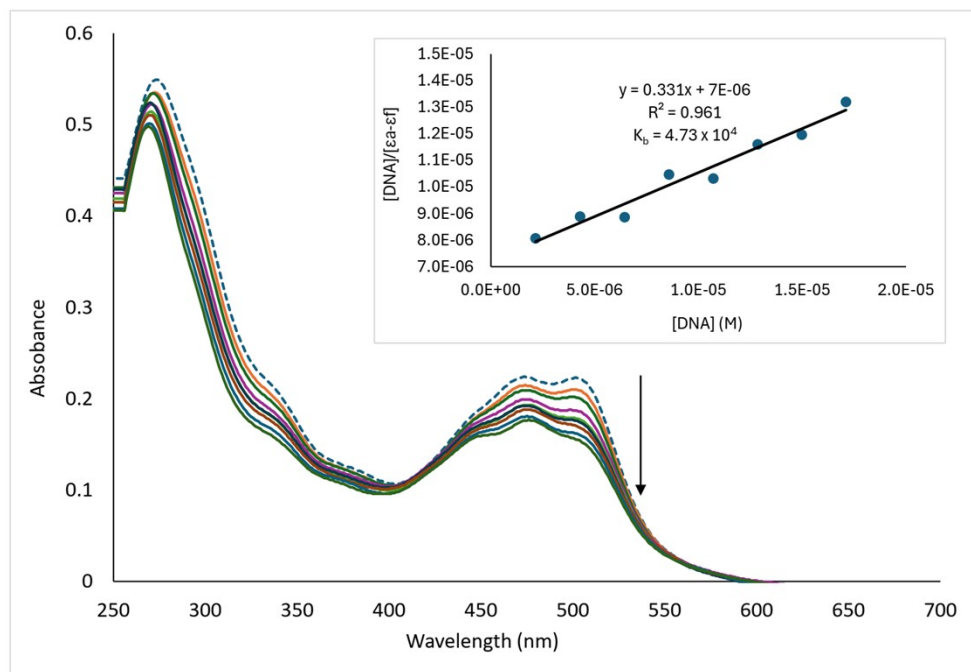

**Figure S15:** Electronic absorption spectrum of complex **1** in the absence (dashed line) and the presence of different concentrations of ctDNA

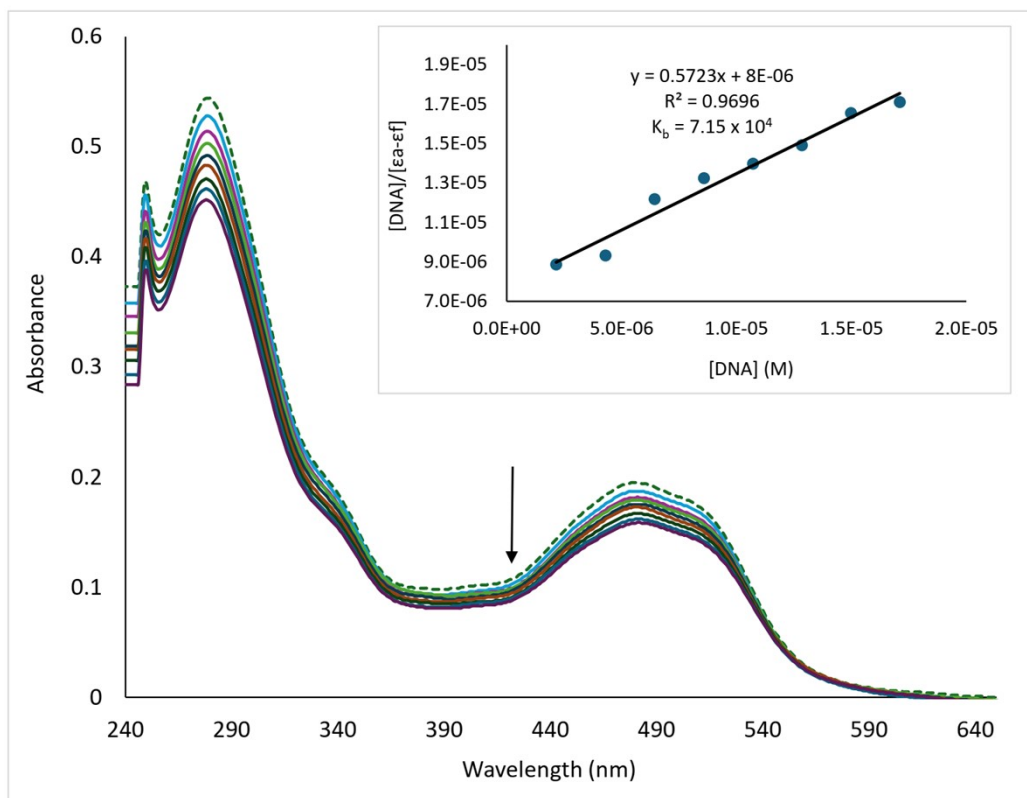

**Figure S16:** Electronic absorption spectrum of complex **2** in the absence (dashed line) and the presence of different concentrations of ctDNA

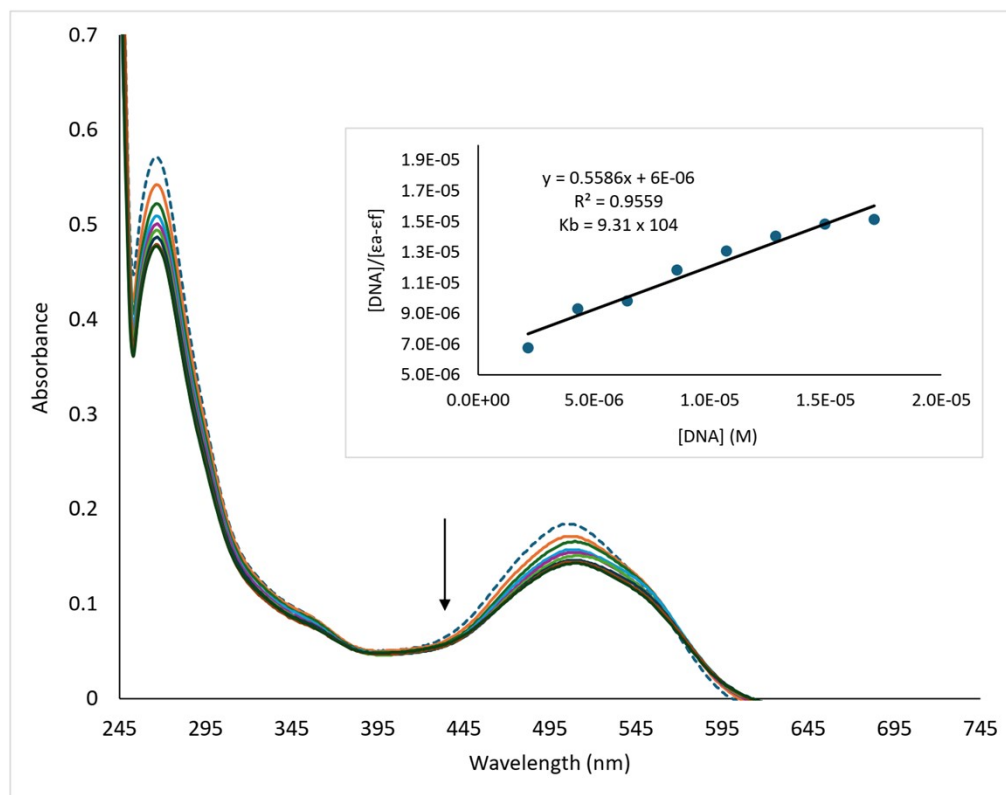

**Figure S17:** Electronic absorption spectrum of complex **3** in the absence (dashed line) and the presence of different concentrations of ctDNA

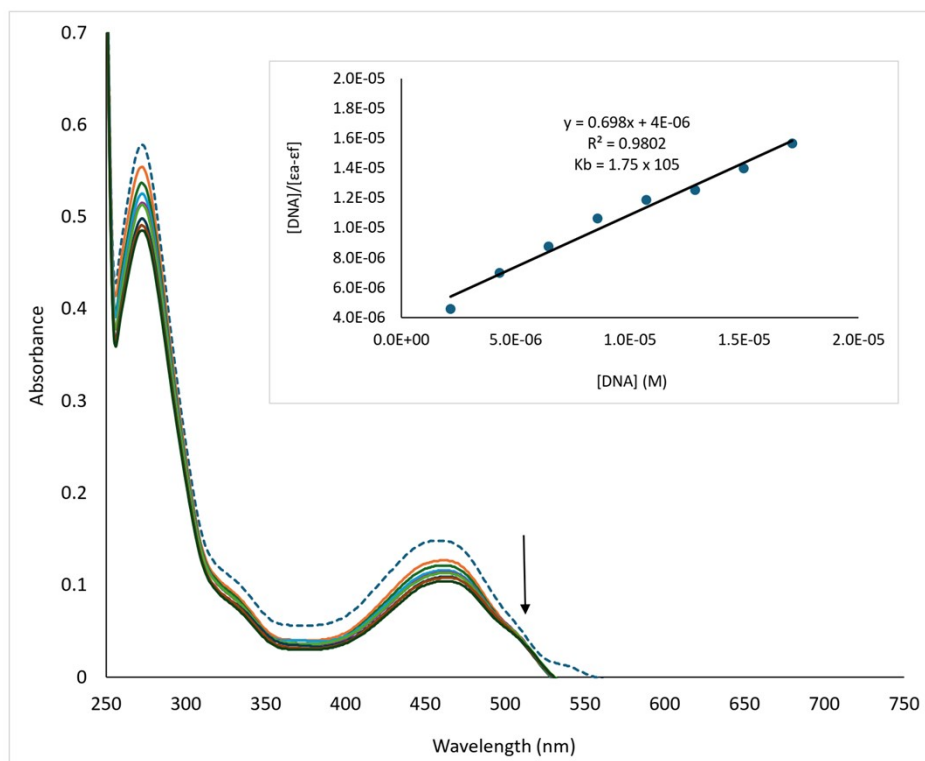

Figure S18: Electronic absorption spectrum of complex 4 in the absence (dashed line) and the presence of different concentrations of ctDNA

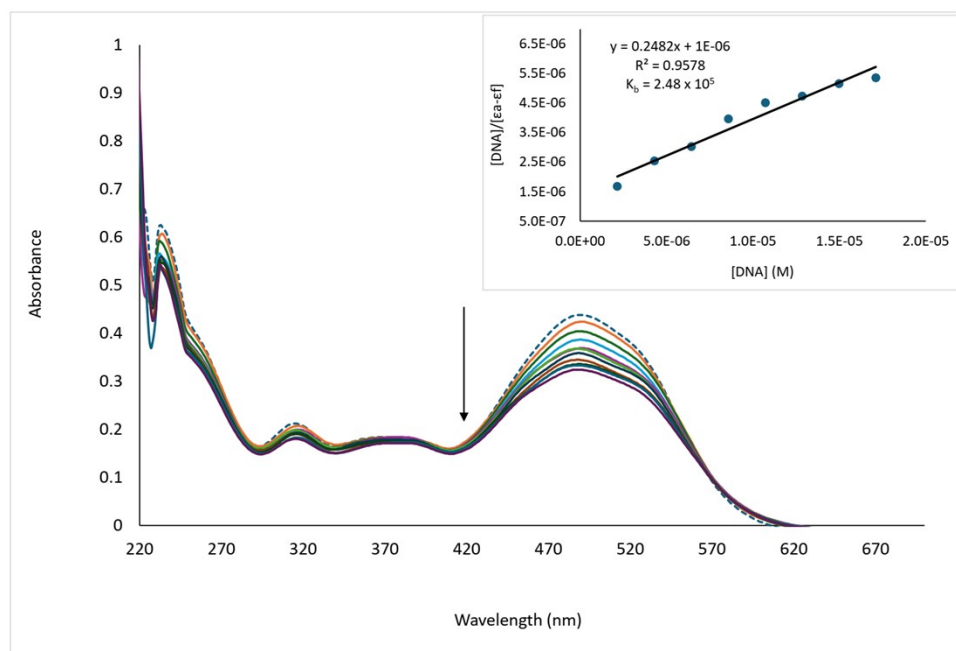

**Figure S19:** Electronic absorption spectrum of complex **6** in the absence (dashed line) and the presence of different concentrations of ctDNA

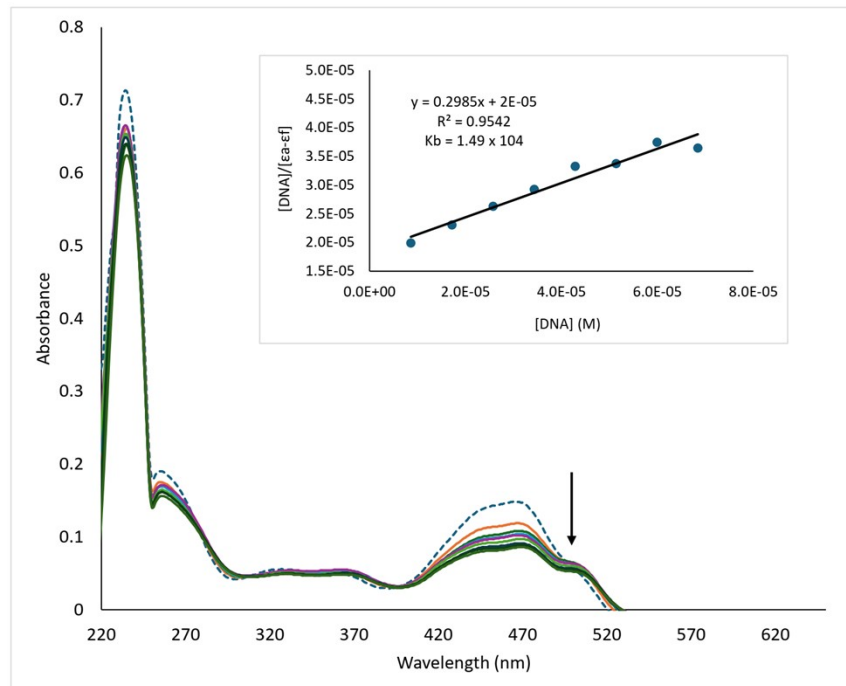

**Figure S20:** Electronic absorption spectrum of complex L1 in the absence (dashed line) and the presence of different concentrations of ctDNA

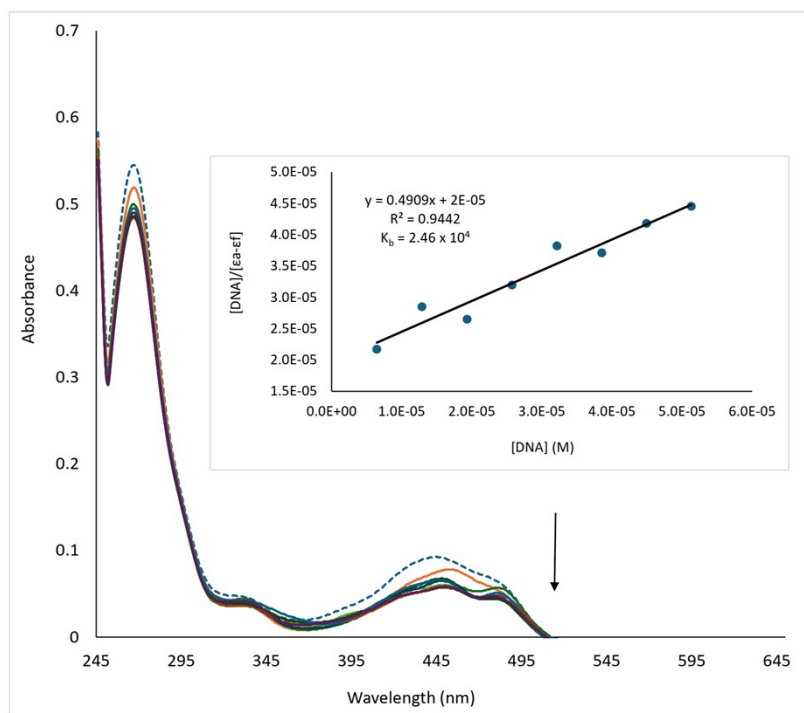

**Figure S21:** Electronic absorption spectrum of complex L2 in the absence (dashed line) and the presence of different concentrations of ctDNA

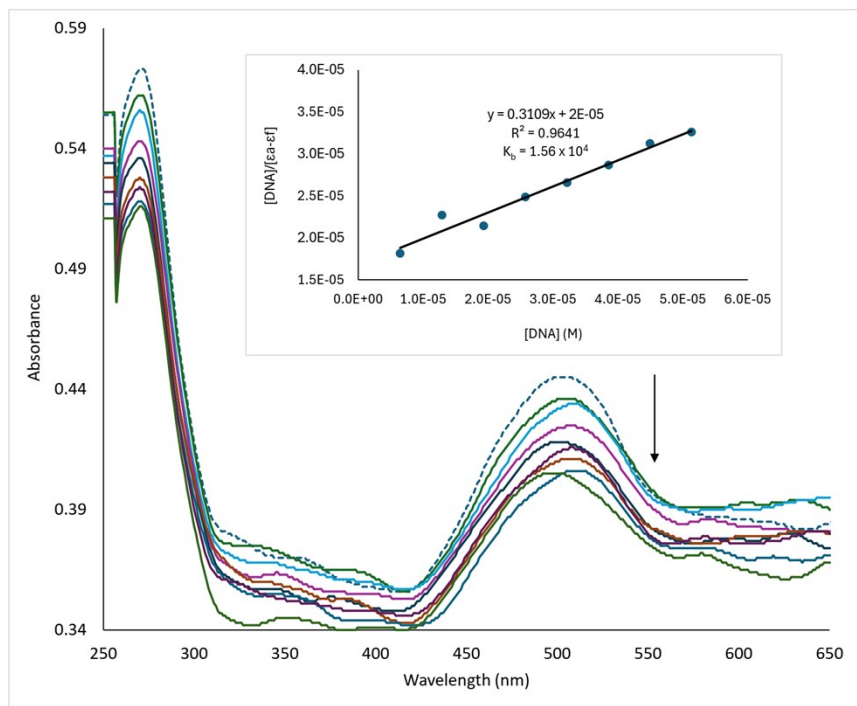

**Figure S22:** Electronic absorption spectrum of complex L3 in the absence (dashed line) and the presence of different concentrations of ctDNA

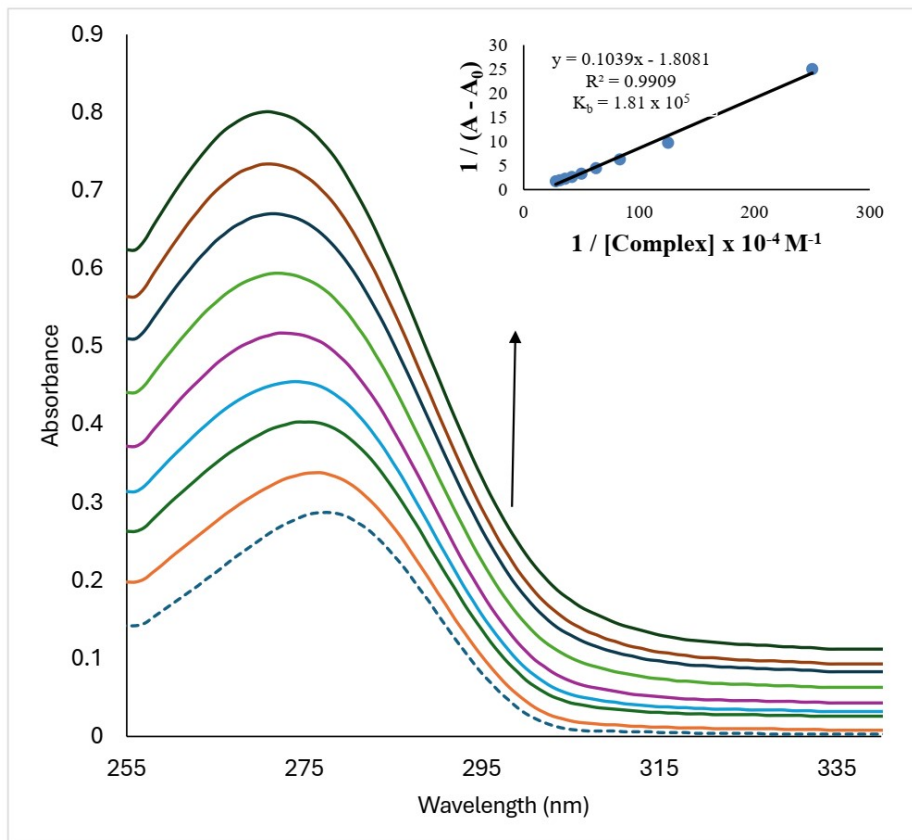

**Figure S23:** Electronic Absorption Spectra of BSA in the absence (dashed line) and the presence of different concentrations of complex 1.

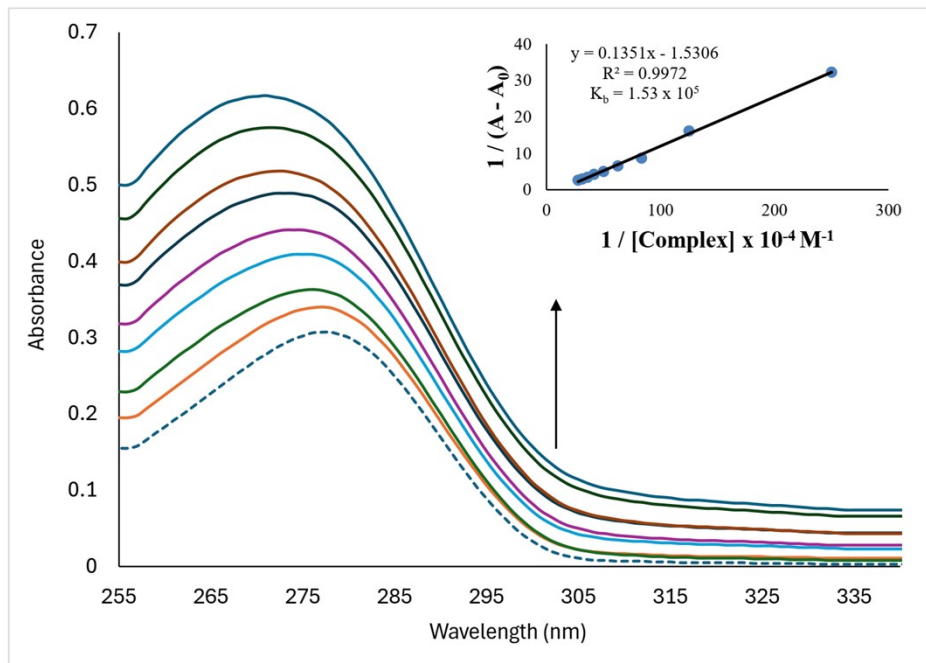

**Figure S24:** Electronic Absorption Spectra of BSA in the absence (dashed line) and the presence of different concentrations of complex **3**.

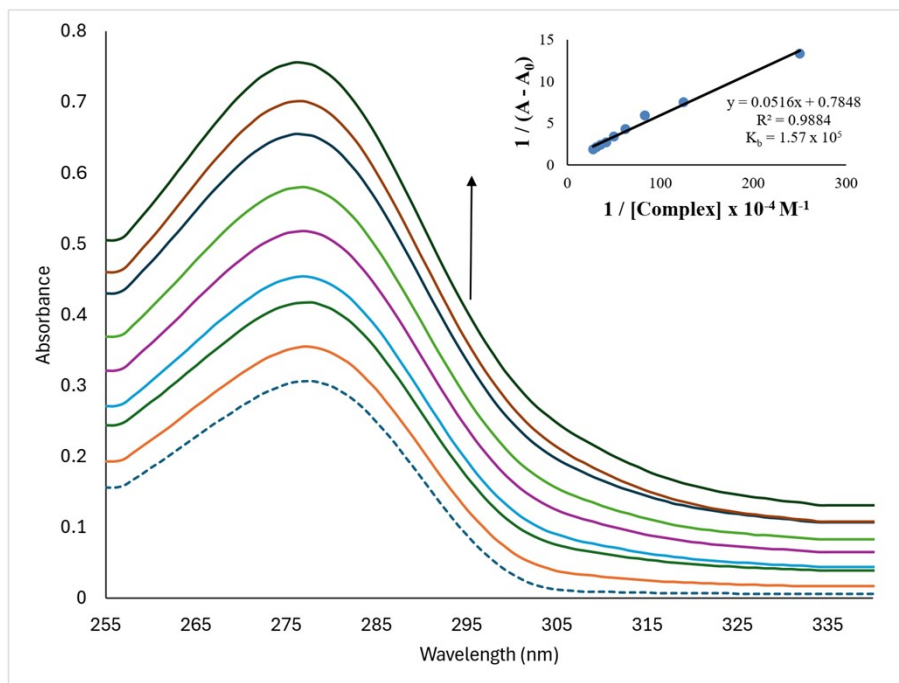

**Figure S25:** Electronic Absorption Spectra of BSA in the absence (dashed line) and the presence of different concentrations of complex 4.

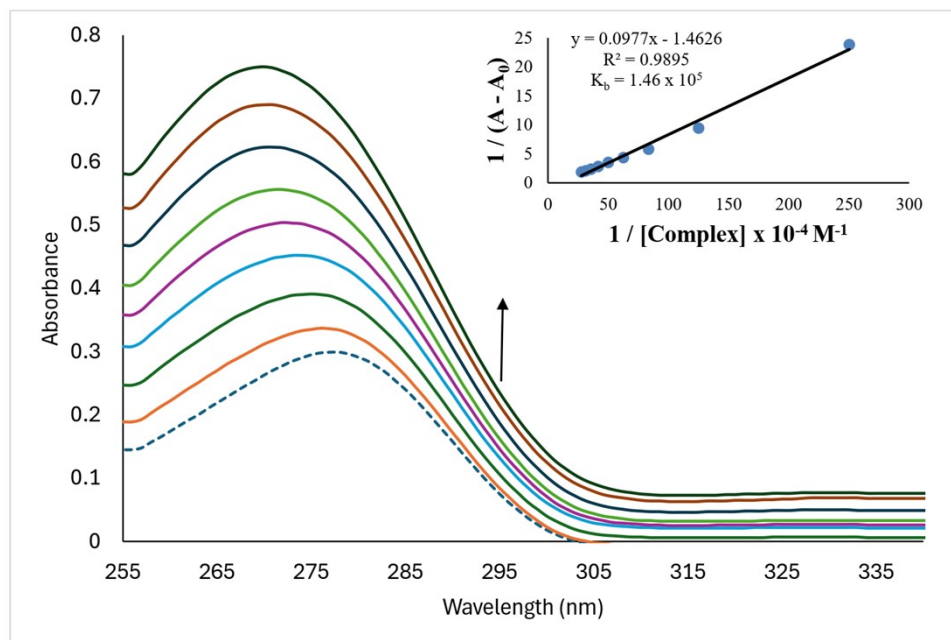

**Figure S26:** Electronic Absorption Spectra of BSA in the absence (dashed line) and the presence of different concentrations of complex **5**.

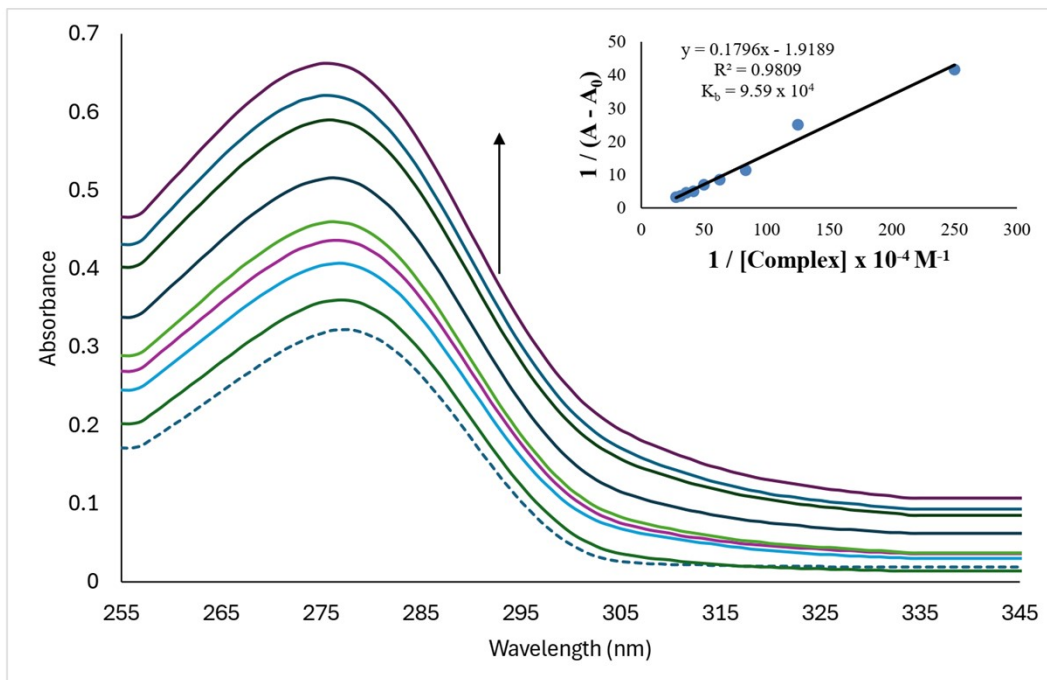

**Figure S27:** Electronic Absorption Spectra of BSA in the absence (dashed line) and the presence of different concentrations of complex 6.
